# Supplementary material
Source: PubMed Central journal article supplement (PMC3655411)
Supplement: NIHMS460894-supplement-Appendix1.pdf [file NIHMS460894-supplement-Appendix1.pdf]

## Appendix 1: Independent Variables Common to all ACL Reconstructions

| Area                                     | # | Independent Variable                       | Potentially Modifiable Variable | Scale                                                                                                                                                                           |
|------------------------------------------|---|--------------------------------------------|---------------------------------|---------------------------------------------------------------------------------------------------------------------------------------------------------------------------------|
| <b>CONCURRENT INJURIES and TREATMENT</b> | 1 | Meniscal tears and treatment               | Yes (Treatment)                 | <ul style="list-style-type: none"> <li>• Normal</li> <li>• Partial tear: no treatment, repair, excision</li> <li>• Complete tear: no treatment, repair, excision</li> </ul>     |
|                                          | 2 | Articular cartilage injuries and treatment | Yes (Treatment)                 | <ul style="list-style-type: none"> <li>• Normal / Grade I</li> <li>• Grades II &amp; III: no treatment</li> <li>• Grades II &amp; III: treatment</li> <li>• Grade IV</li> </ul> |
|                                          | 3 | Partial collateral ligament injury         | No (Treatment)                  | <ul style="list-style-type: none"> <li>• Normal or Grade I</li> <li>• Grade II – MCL</li> <li>• Grade II – LCL</li> </ul>                                                       |
| <b>BEHAVIORAL</b>                        | 4 | Activity level ( $t_0$ )                   | No (Activity)                   | <ul style="list-style-type: none"> <li>• Integer (1-16 Marx scale)</li> </ul>                                                                                                   |
| <b>ALIGNMENT</b>                         | 5 | Clinical knee alignment                    | Yes (Osteotomy)                 | <ul style="list-style-type: none"> <li>• Normal</li> <li>• Valgus</li> <li>• Varus</li> </ul>                                                                                   |
| <b>DEMOGRAPHICS</b>                      | 6 | Gender                                     | No                              | <ul style="list-style-type: none"> <li>• Male</li> <li>• Female</li> </ul>                                                                                                      |
|                                          | 7 | Age                                        | No                              | <ul style="list-style-type: none"> <li>• Integer</li> </ul>                                                                                                                     |
|                                          | 8 | BMI                                        | Yes (Weight)                    | <ul style="list-style-type: none"> <li>• Continuous variable</li> </ul>                                                                                                         |
