# Supplementary material
Source: PubMed Central journal article supplement (PMC3655411)
Supplement: NIHMS460894-supplement-Appendix2.pdf [file NIHMS460894-supplement-Appendix2.pdf]

## Appendix 2: Non-modifiable Independent Variables Unique to Revision ACL Reconstructions

*(Documented on the surgeon form at the time of revision surgery)*

| #  | Independent Variable                     | Scale                                                                                                                                                                                                                                                                                    |
|----|------------------------------------------|------------------------------------------------------------------------------------------------------------------------------------------------------------------------------------------------------------------------------------------------------------------------------------------|
| 9  | # of prior ACL reconstructions           | <ul style="list-style-type: none"> <li>• Integer (1-5)</li> </ul>                                                                                                                                                                                                                        |
| 10 | Revising surgeon is also primary surgeon | <ul style="list-style-type: none"> <li>• No</li> <li>• Yes</li> </ul>                                                                                                                                                                                                                    |
| 11 | Prior graft type                         | <ul style="list-style-type: none"> <li>• Autograft</li> <li>• Allograft</li> </ul>                                                                                                                                                                                                       |
| 12 | Prior femoral tunnel position            | <ul style="list-style-type: none"> <li>• Ideal</li> <li>• Ideal, but enlarged tunnels</li> <li>• Compromised – position too vertical</li> <li>• Compromised – position too anterior</li> <li>• Compromised, due to size</li> <li>• Compromised, due to both position and size</li> </ul> |
| 13 | Prior tibial tunnel position             | <ul style="list-style-type: none"> <li>• Ideal</li> <li>• Ideal, but enlarged tunnels</li> <li>• Compromised – position too vertical</li> <li>• Compromised – position too anterior</li> <li>• Compromised, due to size</li> <li>• Compromised, due to both position and size</li> </ul> |
